# Supplementary material for: Catalytic Reduction of Carbon Dioxide on the (001), (011), and (111) Surfaces of TiC and ZrC: A Computational Study
Source: PubMed Central journal article supplement (PMC8958596; doi:10.1021/acs.jpcc.1c10180), 2022-03-14
Supplement: jp1c10180_si_001.pdf [file jp1c10180_si_001.pdf]

## Supporting information

# The Catalytic Reduction of Carbon Dioxide on the (001), (011), and (111) surfaces of TiC and ZrC: a Computational Study

*Fabrizio Silveri<sup>1,2,3\*</sup>, Matthew G. Quesne<sup>1,4</sup> Francesc Viñes Solana<sup>2</sup>, Francesc Illas Riera<sup>2</sup>, C.*

*Richard A. Catlow<sup>1,4,6</sup> and Nora H. de Leeuw<sup>1,5</sup>*

<sup>1</sup>School of Chemistry, Cardiff University, Main Building, Park Place, Cardiff CF10 3AT, UK.

<sup>2</sup>Departament de Ciència de Materials i Química Física and Institut de Química Teòrica i

Computacional (IQTCUB), Universitat de Barcelona, c/Martí i Franquès 1-11, 08028 Barcelona,

Spain

<sup>3</sup>Gemmate Technologies s.r.l., via Reano, 31, 10090 Buttigliera Alta (TO), Italy

<sup>4</sup>UK Catalysis Hub, Research Complex at Harwell, STFC Rutherford Appleton Laboratory,

Didcot, Oxfordshire OX11 0FA, UK

<sup>5</sup>School of Chemistry, University of Leeds, Leeds LS2 9JT, UK

<sup>6</sup>Department of Chemistry, University College London, 20 Gordon St., London WC1 HOAJ, UK

**Table S1** Activation energy for CO<sub>2</sub> adsorption reported in this work compared to previously reported values<sup>7</sup>.

|              | TiC                               |                                   |               | ZrC                               |                                   |               |
|--------------|-----------------------------------|-----------------------------------|---------------|-----------------------------------|-----------------------------------|---------------|
|              | <sup>a</sup> <i>E<sub>r</sub></i> | <sup>b</sup> <i>E<sub>r</sub></i> | % <i>diff</i> | <sup>a</sup> <i>E<sub>r</sub></i> | <sup>b</sup> <i>E<sub>r</sub></i> | % <i>diff</i> |
| <b>(001)</b> | -0.90                             | -0.86                             | -0.05         | -1.68                             | -1.62                             | -0.04         |
| <b>(011)</b> | -3.45                             | -3.45                             | 0.00          | -4.19                             | -1.03                             | -3.07         |
| <b>(111)</b> | -3.11                             | -3.05                             | -0.02         | -3.17                             | -3.32                             | 0.04          |

<sup>a</sup>*E<sub>r</sub>* lowest energy CO<sub>2</sub> adsorption energy. <sup>b</sup>*E<sub>r</sub>* previously reported CO<sub>2</sub> adsorption values using the geometry scan method<sup>1</sup>. %*diff* percentage between CO<sub>2</sub> adsorption values determined using both methods.

## References

- (1) Quesne, M. G.; Roldan, A.; De Leeuw, N. H.; Catlow, C. R. A. Carbon Dioxide and Water Co-Adsorption on the Low-Index Surfaces of TiC, VC, ZrC and NbC: A DFT Study. *Phys. Chem. Chem. Phys.* **2019**, *21* (20). <https://doi.org/10.1039/c9cp00924h>.
